# Supplementary material for: Identification and Characterization of PLATZ Transcription Factors in Wheat
Source: Int J Mol Sci. 2020 Nov 25;21(23):8934. doi: 10.3390/ijms21238934 (PMC7728089; doi:10.3390/ijms21238934)
Supplement: Supplementary file 1 [file ijms-21-08934-s001.xlsx]

## Sheet: Table S1
Table S1 – Sixty-two TaPLATZ genes identified in wheat.
Gene name	IWGSC ID, Ref seq v1.1 / Scaffold, Ref seq v2.0	Confidence	Splice variant	Genomic coordinates	Chr.	Chromosome strand	AA	MW (kDa)	PI	Predicted subcellular location
TaPLATZ1	TraesCS1A02G068200	HC	1	49516730--49518411	1A	−	247	27.23	6.46	Nucleus
TaPLATZ2	TraesCS1A02G192800	HC	1	348398566--348400900	1A	−	270	28.97	9.03	Nucleus
TaPLATZ3	TraesCS1B02G086700	HC	1	74244080--74245605	1B	+	257	28.67	5.21	Nucleus
TaPLATZ4	TraesCS1B02G207700	HC	1	375257022--375258403	1B	−	257	27.68	8.81	Nucleus
TaPLATZ5	TraesCS1D02G069600	HC	1	50290239--50291961	1D	−	250	27.7	5.75	Nucleus
TaPLATZ6	TraesCS1D02G196400	HC	1	275942527--275943946	1D	−	266	28.53	8.99	Nucleus
TaPLATZ7	TraesCS2A02G448300	HC	1	697289195--697291790	2A	+	246	27.1	9.26	Nucleus
TaPLATZ8	TraesCS2A02G496300	HC	1	727304957--727306412	2A	+	217	24.05	5.97	Nucleus
TaPLATZ9	Chr2A-731347559-731348605			731347559--731348605	2A	+	161	18.19	6.51	Nucleus
TaPLATZ10	Chr2A-731362094-731363319			731362094--731363319	2A	+	211	23.33	6.48	Nucleus
TaPLATZ11	Chr2A-731396509-731397555			731396509--731397555	2A	+	155	17.38	5.93	Nucleus
TaPLATZ12	Chr2A-731402914-731404122			731402914--731404122	2A	+	161	18.43	5.42	Nucleus
TaPLATZ13	Chr2A-731425059-731426105			731425059--731426105	2A	+	161	18.19	7.58	Nucleus
TaPLATZ14	Chr2A-731441915-731443126			731441915--731443126	2A	+	216	24.06	6.69	Nucleus
TaPLATZ15	TraesCS2A02G496400	HC	1	727437208--727438258	2A	+	161	18.41	6.2	Nucleus
TaPLATZ16	TraesCS2A02G496500	HC	1	727443846--727444875	2A	+	158	18.06	6.49	Nucleus
TaPLATZ17	TraesCS2B02G469000	HC	1	664933000--664935087	2B	+	246	27.12	9.26	Nucleus
TaPLATZ18	TraesCS2B02G524600	HC	1	719124876--719125937	2B	+	161	17.98	6.98	Nucleus
TaPLATZ19	TraesCS2D02G496700	HC	1	593002622--593004476	2D	+	195	21.65	6.49	Nucleus
TaPLATZ20	TraesCS2D02G447400	HC	1	557258057--557260499	2D	+	246	27.07	9.26	Nucleus
TaPLATZ21	TraesCS2D02G496600	HC	1	592993880--592995103	2D	+	219	24.16	5.97	Extracellular\Chloroplast
TaPLATZ22	Chr2D-595952368-595953593			595952368--595953593	2D	+	161	18.04	5.65	Nucleus
TaPLATZ23	TraesCS2D02G611500LC	LC	1	593023845--593025040	2D	+	145	16.67	7.67	Nucleus
TaPLATZ24	Chr2D-596055068-596056297			596055068--596056297	2D	+	230	25.11	9.06	Extracellular\Chloroplast.
TaPLATZ25	TraesCS2D02G611600LC	LC	1	593113277--593123851	2D	+	205	22.65	9.25	Nucleus
TaPLATZ26	TraesCS3A02G497600	HC	1	723660599--723661831	3A	+	215	24.22	7.94	Nucleus
TaPLATZ27	TraesCS3A02G497900	HC	1	724022178--724025060	3A	+	229	25.89	8.49	Nucleus
TaPLATZ28	TraesCS3B02G560400	HC	1	794543281--794544515	3B	−	215	24.25	7.52	Nucleus\Chloroplast
TaPLATZ29	TraesCS3B02G560600	HC	1	794592319--794593438	3B	−	216	24.39	7	Nucleus
TaPLATZ30	TraesCS3B02G561000	HC	1	794839275--794840475	3B	−	215	24.34	7	Nucleus
TaPLATZ31	TraesCS3D02G505200	HC	1	592608017--592609175	3D	+	215	24.31	7.94	Nucleus
TaPLATZ32	TraesCS3D02G505000	HC	1	592575920--592577541	3D	+	215	24.31	6.95	Nucleus
TaPLATZ33	TraesCS6A02G145200	HC	1	123446047--123447750	6A	+	237	27.23	8.67	Nucleus
TaPLATZ34	TraesCS6A02G156600	HC	1	145651357--145654637	6A	−	243	26.34	8.94	Nucleus
TaPLATZ35	Chr6A-175682261-175691969			175682261--175691969	6A	+	207	23.3	9.01	Nucleus\Chloroplast
TaPLATZ36	Chr6A-176000290-176002827			176000290--176002827	6A	+	211	23.6	8.45	Nucleus\Cytoplasmic
TaPLATZ37	TraesCS6A02G168400	HC	1	174449723--174451856	6A	+	215	24.12	6.17	Nucleus\Cytoplasmic
TaPLATZ38	TraesCS6A02G248200	HC	1	461112196--461113157	6A	+	203	22.17	8.74	Nucleus
TaPLATZ39	TraesCS6A02G264400	HC	1	488061664--488063638	6A	−	275	29.76	9.25	Nucleus
TaPLATZ40	TraesCS6B02G173400	HC	1	187831386--187833269	6B	+	237	27.26	8.67	Nucleus
TaPLATZ41	TraesCS6B02G282400LC	LC	1	207804172--207807666	6B	−	250	27.44	8.84	Nucleus
TaPLATZ42	TraesCS6B02G196100	HC	1	232323534--232326501	6B	+	211	23.49	8.26	Nucleus\Cytoplasmic
TaPLATZ43	Chr6B-238651595-238653780			238651595--238653780	6B	+	218	24.38	7.52	Nucleus\Cytoplasmic
TaPLATZ44	TraesCS6B02G276500	HC	1	500238878--500239756	6B	−	198	21.58	9.03	Nucleus\mitochondrial
TaPLATZ45	TraesCS6B02G291400	HC	1	524063395--524065066	6B	−	248	27	9.48	Nucleus
TaPLATZ46	TraesCS6D02G134200	HC	1	102114863--102116547	6D	+	237	27.23	8.67	Nucleus
TaPLATZ47	TraesCS6D02G146600	HC	1	118267324--118271220	6D	+	243	26.55	8.94	Nucleus
TaPLATZ48	TraesCS6D02G157400	HC	1	133480333--133483433	6D	+	211	23.54	8.49	Nucleus\Cytoplasmic
TaPLATZ49	TraesCS6D02G157500	HC	1	133581340--133583526	6D	+	219	24.43	5.49	Nucleus\Cytoplasmic
TaPLATZ50	Chr6D-155356346-155358518			155356346--155358518	6D	+	217	24.38	6.65	Nucleus\Cytoplasmic
TaPLATZ51	Chr6D-155427532-155429708			155427532--155429708	6D	+	216	24.12	5.73	Nucleus\Cytoplasmic
TaPLATZ52	TraesCS6D02G230300	HC	1	323688214--323689091	6D	+	203	22.09	9.02	Nucleus
TaPLATZ53	TraesCS6D02G250500	HC	1	354222889--354224540	6D	+	249	26.88	9.6	Nucleus
TaPLATZ54	TraesCS7A02G281000	HC	1	303101577--303102542	7A	−	214	22.78	9.24	Nucleus\Chloroplast
TaPLATZ55	TraesCS7A02G394800	HC	1	573093489--573097823	7A	−	242	26.85	9.36	Nucleus
TaPLATZ56	TraesCS7A02G479100	HC	1	671847340--671851409	7A	−	255	28.08	8.69	Nucleus
TaPLATZ57	TraesCS7B02G180100	HC	1	268453534--268455948	7B	+	267	29.13	9.68	PlasmaMembrane\Chloroplast\Nucleus
TaPLATZ58	TraesCS7B02G296800	HC	1	533567060--533571641	7B	−	242	27.01	9.36	Nucleus
TaPLATZ59	TraesCS7B02G381500	HC	1	646680061--646684266	7B	−	256	28.17	8.79	Nucleus
TaPLATZ60	TraesCS7D02G279600	HC	1	271506389--271507337	7D	−	266	28.85	9.68	Nucleus
TaPLATZ61	TraesCS7D02G390300	HC	1	505599929--505604509	7D	−	242	26.93	9.36	Nucleus
TaPLATZ62	TraesCS7D02G466400	HC	1	580263133--580267375	7D	−	254	28.09	8.9	Nucleus

## Sheet: Table S2
Table S2 – PLATZ genes from rice and maize used in this stury
Accession No.	Species	Chr.	Start	End	RAP_Locus	ModelV3	ModelV4
LOC_Os01g33350	Rice	Chr1	18366441	18364956	Os01g0517800
LOC_Os01g33370	Rice	Chr1	18376668	18374765	Os01g0518000
LOC_Os02g07650	Rice	Chr2	3971431	3975149	Os02g0172800
LOC_Os02g09070	Rice	Chr2	4641461	4640152	Os02g0183000
LOC_Os02g10000	Rice	Chr2	5204591	5202094	Os02g0193400
LOC_Os02g44260	Rice	Chr2	26782633	26781596	Os02g0661400
LOC_Os02g46610	Rice	Chr2	28436702	28435057	Os02g0692700
LOC_Os03g12440	Rice	Chr3	6566149	6570203	Os03g0225450
LOC_Os04g50120	Rice	Chr4	29896857	29894656	Os04g0591100
LOC_Os06g41930	Rice	Chr6	25158312	25164627	Os06g0624900
LOC_Os06g45540(SG6/GL6)	Rice	Chr6	27557183	27561599	Os06g0666100
LOC_Os08g44620	Rice	Chr8	28061198	28059345	Os08t0560300
LOC_Os09g02790	Rice	Chr9	1282979	1278420	Os09g0116050
LOC_Os10g42410	Rice	Chr10	22831617	22829131	Os10g0574700
LOC_Os11g24130	Rice	Chr11	13718965	13720110	Os11g0428700
ZmPLATZ1	Maize	Chr1	40221978	40223031		GRMZM2G408887	Zm00001d028594
ZmPLATZ2	Maize	Chr1	70442356	70448204		GRMZM2G311656	Zm00001d029437
ZmPLATZ3	Maize	Chr1	101087719	101089688		GRMZM2G094168	Zm00001d030032
ZmPLATZ4	Maize	Chr1	206932526	206934498		GRMZM2G171934	Zm00001d031925
ZmPLATZ5	Maize	Chr2	13850163	13852195		GRMZM2G131280	Zm00001d002489
ZmPLATZ6	Maize	Chr4	156414419	156415562		GRMZM2G342691	Zm00001d051376
ZmPLATZ7	Maize	Chr4	160984327	160986154		GRMZM2G091044	Zm00001d051511
ZmPLATZ8	Maize	Chr5	88146164	88150303		GRMZM2G017882	Zm00001d015394
ZmPLATZ9	Maize	Chr5	97682870	97684322		GRMZM2G070295	Zm00001d015560
ZmPLATZ10	Maize	Chr5	127438923	127439977		GRMZM2G323553	Zm00001d015868
ZmPLATZ11	Maize	Chr5	204120837	204122561		GRMZM2G004548	Zm00001d017682
ZmPLATZ12(Fl3)	Maize	Chr8	52707946	52709109		GRMZM2G006585	Zm00001d009292
ZmPLATZ13	Maize	Chr9	115708968	115711076		GRMZM2G093270	Zm00001d047025
ZmPLATZ14	Maize	Chr9	124047961	124049024		GRMZM2G077495	Zm00001d047250
ZmPLATZ15	Maize	Chr10	136891569	136893726		GRMZM2G086403	Zm00001d026047(T002)
ZmPLATZ16	Maize	Chr9	102440929	102445873			Zm00001d046688
ZmPLATZ17	Maize	Chr9	113035703	113040261			Zm00001d046958

## Sheet: Table S3
Table S3 – Primers for qRT-PCR analysis in this study
Purpose	Gene and accession number	Primer name	Primer sequence (5'-3')	Tm (oC)	Product size (bp)
Real-time PCR	TaPLATZ2	1A192800_F	CAACGACAAGGCGAGGACGAT	65	100
		1A192800_R	GGCATTGCGCAGGGGAGA
	TaPLATZ4	1B207700_F	ACAAGGCGAGGGTGATGCGG	63	93
		1B207700_R	GACGGCGTGAAGCTCTGTC
	TaPLATZ6	1D196400_F	CAACGACAAGGCGAGGATGAT	62	106
		1D196400_R	GCCTGGCGGCATTGCG
	TaPLATZ26	3A497600_2F	GCGGCTTCTGCTATTATTGT	63	104
		3A497600_2R	CTTTTAACTCGGCAACCCT
	TaPLATZ29	3B560600_F	GTGTTTCTGTGGTCAAGGCATC	60	99
		3B560600_R	TTGCAACCCAGGGAGCAG
	TaPLATZ30	3B561000_F	GCTGCCTTATGCTATTATTGCC	55	126
		3B561000_R	CATCACTGATATCAAGTACATC
	TaPLATZ32	3D505000_2F	GCACCAACCATCTCTTCTCT	64	142
		3D505000_2R	GTATGACGACCGCCTTATCT
	TaPLATZ31	3D505200_2F	CCTATTCTGCATAGACTGTGAG	62	143
		3D505200_2R	TATGATGACCGCCTTATCTG
	TaPLATZ27	3A497900_5F	GATCAACAGTGCAACAGTTGTT	60	121
		3A497900_5R	AAGAAGAGCACGATTGCAAC
	TaPLATZ28	3B560400_1F	TCGTGGTTGTGGTGTTTCCGC	60	128
		3B560400_1R	CCTCTTTGATTCCTTTAAGATTGC
	BE429982	Ta.14126.1.S1_at-F	GAGTCTGCCCACCCATTCGTAA	60	132
		Ta.14126.1.S1_at-R	GACATGCCATAGGTTTCAGCGAC
	CA680072	Ta.7894.3.A1_at-F	AGCAAGTTGTGACCCGAGGA	60	95
		Ta.7894.3.A1_at-R	GGCGTCAGCAAATAGCAAGTG
	TaGAPDH	TaGAPDH_F	AGTTCATGCCATGACTGCAA	60	105
		TaGAPDH_R	CCAGTGCTGCTTGGAATGATG

## Sheet: Table S4
Table S4 – Conserved amino acids for the characterized 12 motifs
Motif	Width	E-value	Matched amino acid	Region on PLATZ proteins
12	29	4.2e-83	HDSPPKELRLKNRRSMDGGGPEPDEEEEZ	Close to translation start region
2	24	1.8e-663	AWLGPLLGARFFVPCATHPDLRKN	Conservation cysteine and histidine residues in the N-terminal
8	15	1.1e-365	ECNHFCLDCAGSACA	Conservation cysteine and histidine residues in the N-terminal
3	15	5.5e-582	HRDHHVLQIRRSSYH	PLATZ domain
9	11	1.7e-263	VIRVAELEKVA	PLATZ domain
1	23	2.6e-987	DISLVQTYVINSARVVFLNERPQ	PLATZ domain
5	21	6.5e-504	ARKCKGPAGACLVCGRSLVDP	Conservation cysteine residues in the C-terminal
4	15	4.0e-510	FRFCSLGCKLDGMVS	C-terminal
6	29	1.1e-395	DPNLTFIJDPECKWEYSDSDSEEEEEDGG	C-terminal
11	15	3.5e-90	GTSNPPPGWISYRRR	C-terminal
10	21	5.4e-180	PGPSNSQSIGGTSYTPQTPPG	C-terminal
7	11	2.8e-360	RKGIPHRAPFY	translation terminate region

## Sheet: Table S5
Table S5 – Subfamilies of 62 TaPLATZ genes
Groups	Gene name	Gene ID	Genomic location
I	TaPLATZ20	TraesCS2D02G447400	557258057--557260499
	TaPLATZ7	TraesCS2A02G448300	697289195--697291790
	TaPLATZ17	TraesCS2B02G469000	664933000--664935087
	TaPLATZ45	TraesCS6B02G291400	524063395--524065066
	TaPLATZ53	TraesCS6D02G250500	354222889--354224540
	TaPLATZ39	TraesCS6A02G264400	488061664--488063638
	TaPLATZ6	TraesCS1D02G196400	275942527--275943946
	TaPLATZ2	TraesCS1A02G192800	348398566--348400900
	TaPLATZ4	TraesCS1B02G207700	375257022--375258403
	TaPLATZ1	TraesCS1A02G068200	49516730--49518411
	TaPLATZ5	TraesCS1D02G069600	50290239--50291961
	TaPLATZ3	TraesCS1B02G086700	74244080--74245605
II	TaPLATZ54	TraesCS7A02G281000	303101577--303102542
	TaPLATZ57	TraesCS7B02G180100	268453534--268455948
	TaPLATZ26	TraesCS3A02G497600	723660599--723661831
	TaPLATZ31	TraesCS3D02G505200	592608017--592609175
	TaPLATZ28	TraesCS3B02G560400	794543281--794544515
	TaPLATZ27	TraesCS3A02G497900	724022178--724025060
	TaPLATZ32	TraesCS3D02G505000	592575920--592577541
	TaPLATZ29	TraesCS3B02G560600	794592319--794593438
	TaPLATZ30	TraesCS3B02G561000	794839275--794840475
III	TaPLATZ38	TraesCS6A02G248200	461112196--461113157
	TaPLATZ44	TraesCS6B02G276500	500238878--500239756
	TaPLATZ52	TraesCS6D02G230300	323688214--323689091
	TaPLATZ40	TraesCS6B02G173400	187831386--187833269
	TaPLATZ46	TraesCS6D02G134200	102114863--102116547
	TaPLATZ33	TraesCS6A02G145200	123446047--123447750
	TaPLATZ41	TraesCS6B02G282400LC	207804172--207807666
	TaPLATZ47	TraesCS6D02G146600	118267324--118271220
	TaPLATZ34	TraesCS6A02G156600	145651357--145654637
	TaPLATZ62	TraesCS7D02G466400	580263133--580267375
	TaPLATZ59	TraesCS7B02G381500	646680061--646684266
	TaPLATZ56	TraesCS7A02G479100	671847340--671851409
IV	TaPLATZ55	TraesCS7A02G394800	573093489--573097823
	TaPLATZ60	TraesCS7D02G279600	271506389--271507337
	TaPLATZ58	TraesCS7B02G296800	533567060--533571641
	TaPLATZ61	TraesCS7D02G390300	505599929--505604509
V	TaPLATZ49	TraesCS6D02G157500	133581340--133583526
	TaPLATZ51	Chr6D-155427532-155429708	155427532--155429708
	TaPLATZ50	Chr6D-155356346-155358518	155356346--155358518
	TaPLATZ37	TraesCS6A02G168400	174449723--174451856
	TaPLATZ43	Chr6B-238651595-238653780	238651595--238653780
	TaPLATZ42	TraesCS6B02G196100	232323534--232326501
	TaPLATZ36	Chr6A-176000290-176002827	176000290--176002827
	TaPLATZ35	Chr6A-175682261-175691969	175682261--175691969
	TaPLATZ48	TraesCS6D02G157400	133480333--133483433
VI	TaPLATZ24	Chr2D-596055068-596056297	596055068--596056297
	TaPLATZ25	TraesCS2D02G611600LC	593113277--593123851
	TaPLATZ12	Chr2A-731402914-731404122	731402914--731404122
	TaPLATZ23	TraesCS2D02G611500LC	593023845--593025040
	TaPLATZ16	TraesCS2A02G496500	727443846--727444875
	TaPLATZ10	Chr2A-731362094-731363319	731362094--731363319
	TaPLATZ11	Chr2A-731396509-731397555	731396509--731397555
	TaPLATZ8	TraesCS2A02G496300	727304957--727306412
	TaPLATZ14	Chr2A-731441915-731443126	731441915--731443126
	TaPLATZ21	TraesCS2D02G496600	592993880--592995103
	TaPLATZ19	TraesCS2D02G496700	593002622--593004476
	TaPLATZ22	Chr2D-595952368-595953593	595952368--595953593
	TaPLATZ18	TraesCS2B02G524600	719124876--719125937
	TaPLATZ15	TraesCS2A02G496400	727437208--727438258
	TaPLATZ9	Chr2A-731347559-731348605	731347559--731348605
	TaPLATZ13	Chr2A-731425059-731426105	731425059--731426105

## Sheet: Table S6
Table S6 – Segmental and tandem duplication pairs of TaPLATZ genes
Tandem duplication pairs
Gene name	Chr.	CDS location	Gene name	Chr.	CDS location
TaPLATZ28	3B	794543281--794544515	TaPLATZ29	3B	794592319--794593438
TaPLATZ50	6D	155356346--155358518	TaPLATZ51	6D	155427532--155429708
TaPLATZ48	6D	133480333--133483433	TaPLATZ49	6D	133581340--133583526
TaPLATZ9	2A	731347559--731348605	TaPLATZ10	2A	731362094--731363319
TaPLATZ10	2A	731362094--731363319	TaPLATZ11	2A	731396509--731397555
TaPLATZ11	2A	731396509--731397555	TaPLATZ12	2A	731402914--731404122
TaPLATZ12	2A	731402914--731404122	TaPLATZ13	2A	731425059--731426105
TaPLATZ13	2A	731425059--731426105	TaPLATZ14	2A	731441915--731443126
TaPLATZ8	2A	727304957--727306412	TaPLATZ15	2A	727437208--727438258
TaPLATZ15	2A	727437208--727438258	TaPLATZ16	2A	727443846--727444875
TaPLATZ19	2D	593002622--593004476	TaPLATZ21	2D	592993880--592995103
TaPLATZ21	2D	592993880--592995103	TaPLATZ23	2D	593023845--593025040
TaPLATZ23	2D	593023845--593025040	TaPLATZ25	2D	593113277--593123851
TaPLATZ22	2D	595952368--595953593	TaPLATZ24	2D	596055068--596056297
Segmental duplication pairs
Gene name	Chr.	CDS location	Gene name	Chr.	CDS location
TaPLATZ36	6A	176000290--176002827	TaPLATZ35	6A	175682261--175691969

## Sheet: Table S7
Table S7 – Samples used in RNA-seq data analysis
No.	Tissue	Developmental stage and wheat varieties
1	Root_CM32	Root of Chuanmai 32
2	Root_Fielder	Root of Fielder
3	Root_SHW-L1	Root of SHW-L1
4	Stem_Fielder	Stem of Fielder
5	Leaf_CM32	Leaf of Chuanmai 32
6	Leaf_Fielder	Leaf of Fielder
7	Leaf_SHW-L1	Leaf of SHW-L1
8	Seed_DPA 5_Fielder	Seed, 5 days post anthesis, Fielder
9	Seed_DPA 10_CM32	Seed, 10 days post anthesis, Chuanmai 32
10	Seed_DPA 10_Fielder	Seed, 10 days post anthesis, Fielder
11	Seed_DPA 10_SHW-L1	Seed, 10 days post anthesis, SHW-L1
12	Seed_DPA 15_Fielder	Seed, 15 days post anthesis, Fielder
13	Seed_DPA 20_CM32	Seed, 20 days post anthesis, Chuanmai 32
14	Seed_DPA 20_Fielder	Seed, 20 days post anthesis, Fielder
15	Seed_DPA 20_SHW-L1	Seed, 20 days post anthesis, SHW-L1
16	Seed_DPA 25_Fielder	Seed, 25 days post anthesis, Fielder
17	Seed_DPA 30_CM32	Seed, 30 days post anthesis, Chuanmai 32
18	Seed_DPA 30_Fielder	Seed, 30 days post anthesis, Fielder
19	Seed_DPA 30_SHW-L1	Seed, 30 days post anthesis, SHW-L1
20	Seed_HAI 12_CM32	Seed, 12 h after imbibition, Chuanmai 32
21	Seed_HAI 12_SHW-L1	Seed, 12 h after imbibition, SHW-L1
22	Seed_HAI 24_CM32	Seed, 24 h after imbibition, Chuanmai 32
23	Seed_HAI 24_SHW-L1	Seed, 24 h after imbibition, SHW-L1
24	Whole plant_CM32	whole plant of susceptible Chuanmai 32
25	Whole plant_SHW-L1	whole plant of resistance SHW-L1
